# Supplementary material
Source: PubMed Central journal article supplement (PMC2755969)
Supplement: supp_M109.034355_jbc.M109.034355-1.pdf [file supp_M109.034355_jbc.M109.034355-1.pdf]

## Supplemental Data

### Requirement of Myosin Vb/Rab11a/Rab11-FIP2 Complex in Cholesterol-Regulated Translocation of Niemann-Pick C1 Like 1 Protein to the Cell Surface

#### Supplemental Figures:

**Figure S1. The integrity and dynamics of microfilament are essential for the endocytosis of NPC1L1.**

- A. Diagram showing the procedure to treat the cells. Briefly, the cells were incubated in cholesterol-depleting medium for 60 min. Then the cells were treated with the indicated drugs for 30 min to disturb cytoskeletons. Cholesterol/CDX was directly added to the medium, and the cells were replenished with cholesterol for different time durations and subsequently fixed and analyzed.
- B. CRL-1601/NPC1L1-EGFP cells were treated as shown in (A). At the indicated time points, the cells were fixed and examined by confocal microscopy. Bar, 10  $\mu$ m.

**Figure S2. Expression of the C-terminal tails (CTs) of myosin Va, Vb and Vc analyzed by western blotting.**

NPC1L1-RFP was co-expressed with EGFP-tagged myosin Vb-CTs in CRL-1601 cells. 48 hours after transfection, the cells were harvested and western blotting was carried out with indicated antibodies.

**Figure S3. Deleting the Rab11a-binding site abolishes the dominant-negative effect of myosin Vb-CT.**

- A. NPC1L1-RFP was co-expressed with EGFP-tagged myosin Vb-CT or Rab11a-binding site-deleted myosin Vb-CT (Vb-CT $\Delta$ RBD) individually in CRL-1601 cells. 48 hours after transfection, the cells were either depleted of cholesterol for 60 min (Chol-Dep), or replenished with cholesterol for 60 min (Chol-Rep) following cholesterol depletion. Then the cells were fixed and examined by confocal microscopy. Ctr, control; Bar, 10  $\mu$ m.
- B. Quantification of the intracellular localization of NPC1L1-RFP shown in (A). Error bars represent standard deviations.

**Figure S4. Expression of wild type, the GTP-locked (S17V) or the GDP-locked (T22N) forms of Rab8a does not affect the exocytosis of NPC1L1.**

- A. CRL-1601 cells were co-expressed with NPC1L1-RFP and the EGFP tagged wild type

Rab8a and its two mutants. 48 hours after transfection, the cells were either depleted of cholesterol for 60 min (Chol-Dep), or replenished with cholesterol for 60 min (Chol-Rep) following cholesterol depletion. Then the cells were fixed and examined by confocal microscopy. Ctr, control; Bar, 10  $\mu$ m.

- B. Quantification of the intracellular localization of NPC1L1-RFP shown in (A). Error bars represent standard deviations.

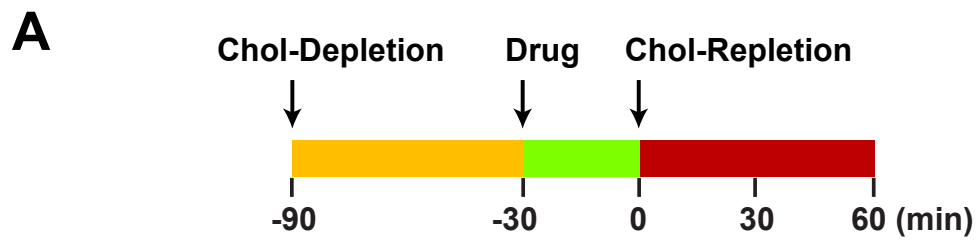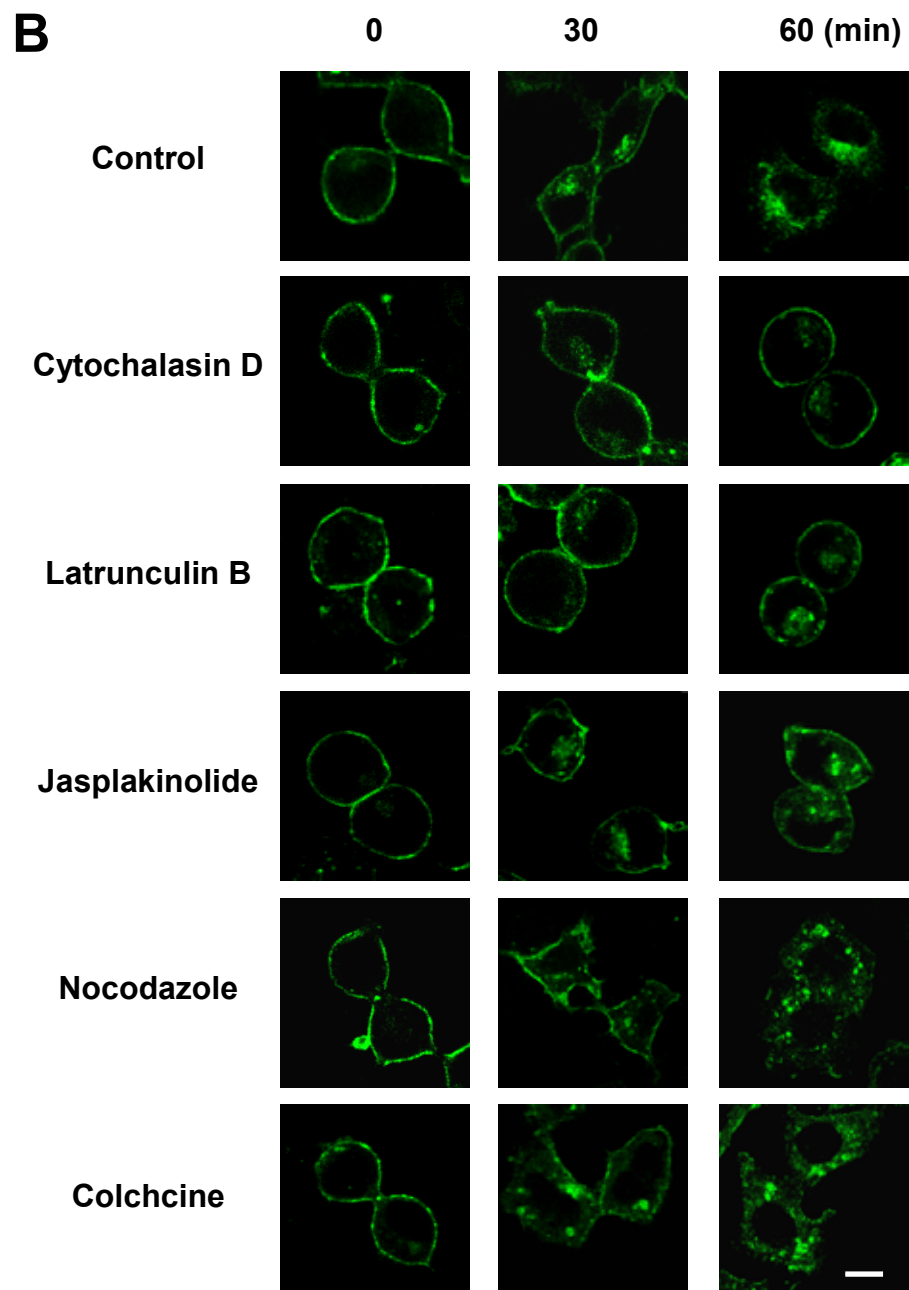

Figure S1

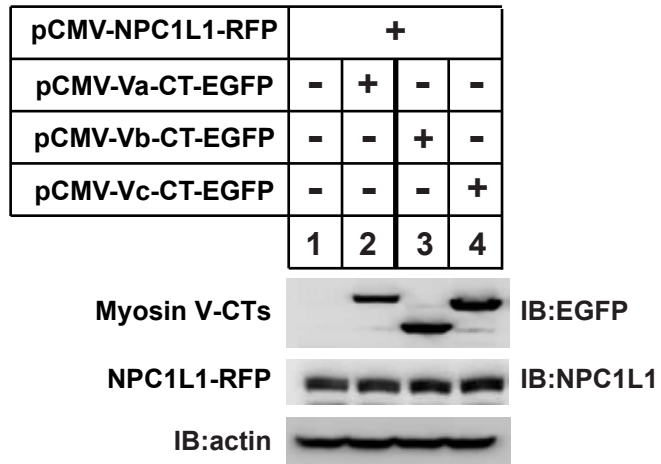

Figure S2

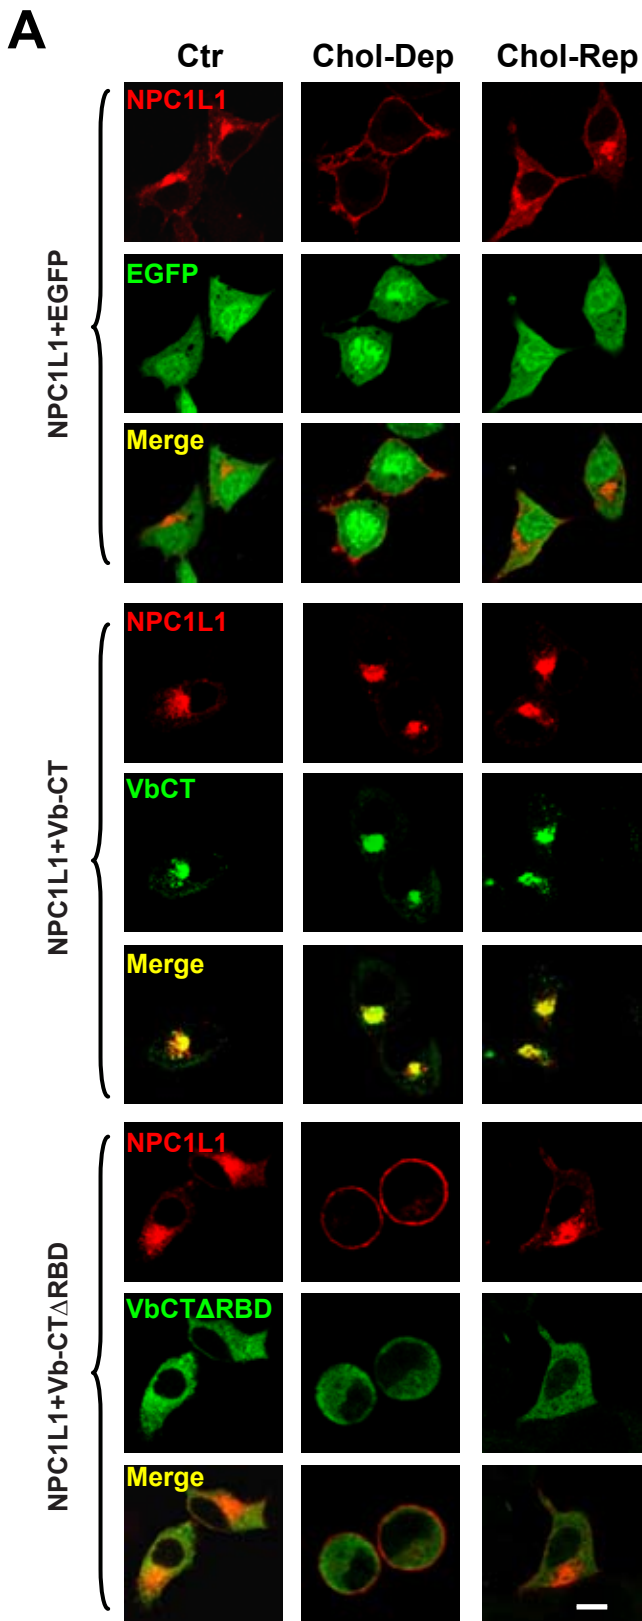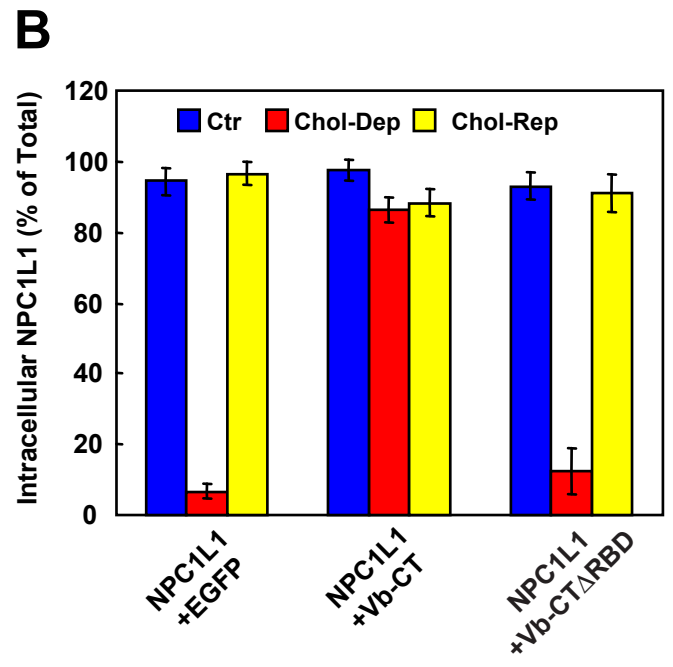

Figure S3

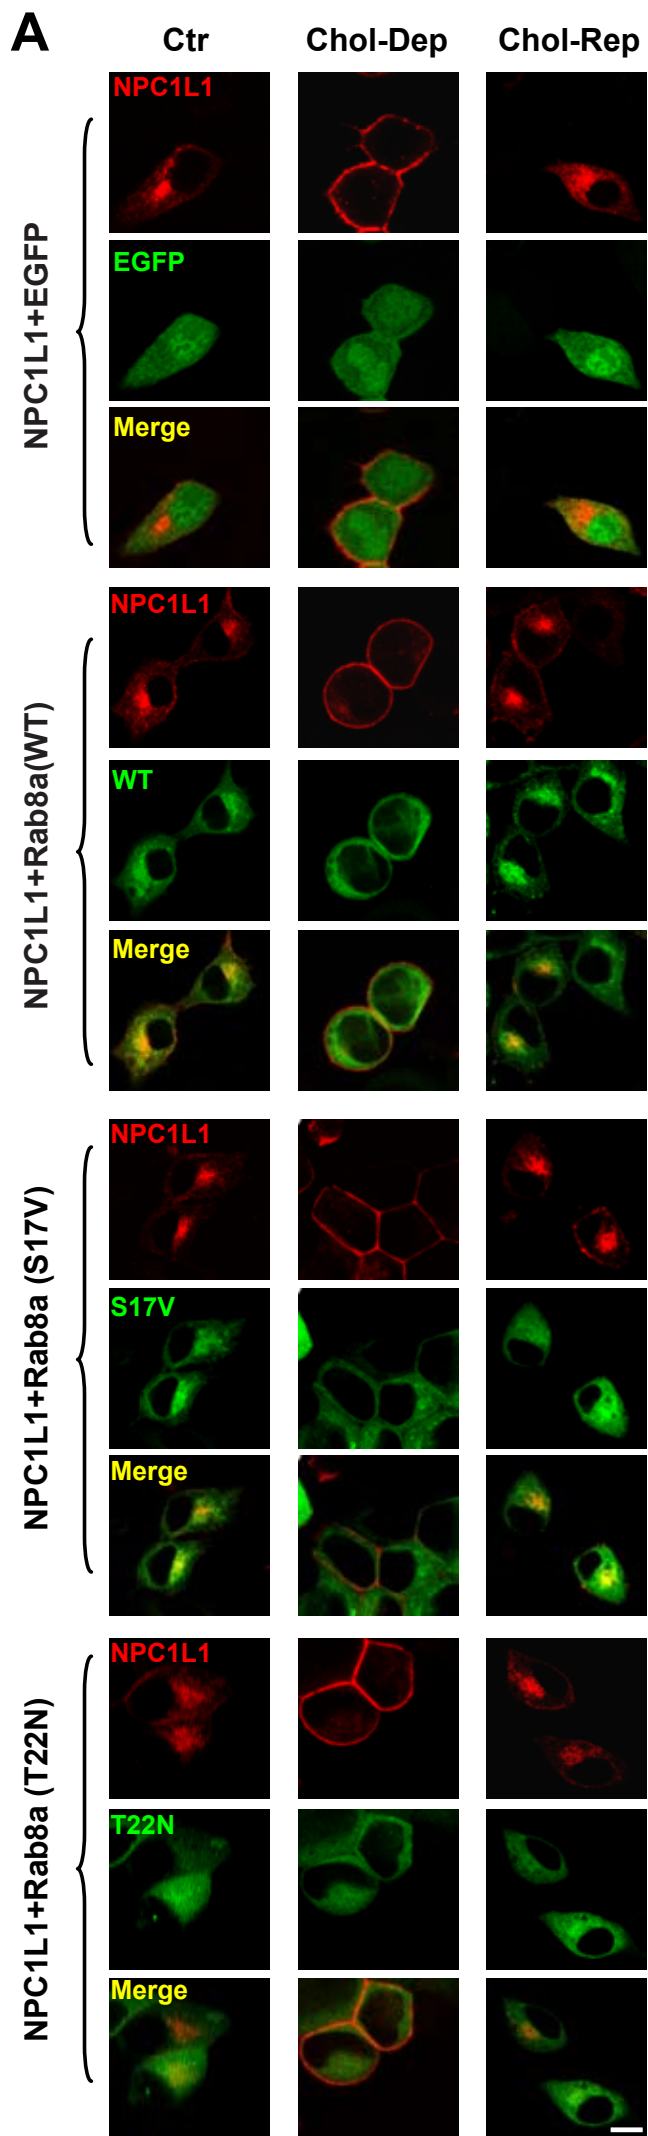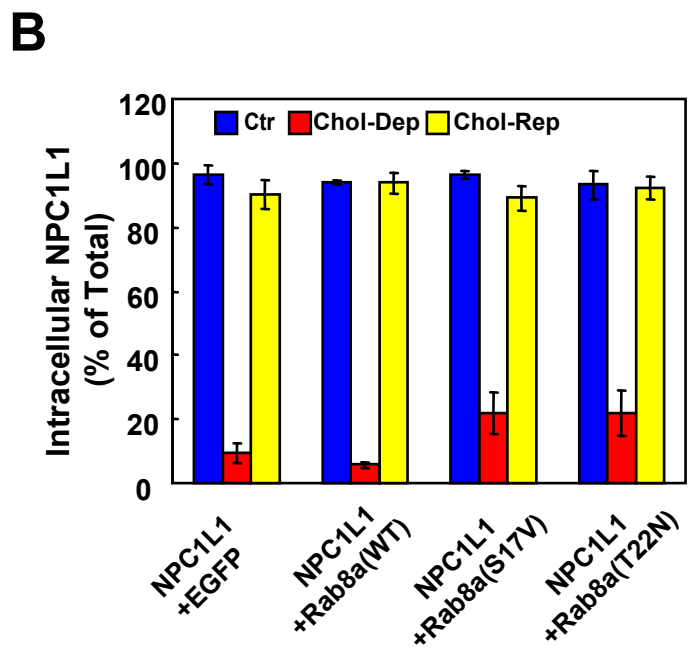

Figure S4
